# Supplementary material for: Molecular and Culture-Based Identification of Aspergillus Species in Water-Impacted Homes Following Hurricane María in Puerto Rico
Source: Research Square preprint supplement (doi:10.21203/rs.3.rs-6786592/v1), 2025-07-17
Supplement: Supplementary file 1 [file 6822e13b3529c2eca843a2d7.docx]

**Supplementary Table S1:** Metadata for *Aspergillus* isolates (n = 28).

| Code | House | Category | Sampling Period | Sampling Media | Area |
| --- | --- | --- | --- | --- | --- |
| 19 | 4 | Flooded | First | G25N | Kitchen |
| 20 | 4 | Flooded | First | G25N | Kitchen |
| 27 | 4 | Flooded | First | G25N | Living Room |
| 33 | 4 | Flooded | First | G25N | Living Room |
| 50 | 4 | Flooded | First | G25N | Bedroom |
| 73 | 10 | Flooded | First | G25N | Bedroom |
| 75 | 10 | Flooded | First | G25N | Bedroom |
| 77 | 10 | Flooded | First | G25N | Bedroom |
| 111 | 27 | Flooded | First | G25N | Living Room |
| 137 | 30 | Flooded | First | G25N | Living Room |
| 139 | 31 | Water-Impacted | First | G25N | Bathroom |
| 143 | 31 | Water-Impacted | First | G25N | Kitchen |
| 150 | 31 | Water-Impacted | First | G25N | Outdoor |
| 155 | 32 | Water-Impacted | First | G25N | Bedroom |
| 159 | 32 | Water-Impacted | First | G25N | Living Room |
| 173 | 52 | Water-Impacted | First | G25N | Kitchen |
| 215 | 49 | Water-Impacted | Second | G25N | Bathroom |
| 226 | 49 | Water-Impacted | Second | G25N | Kitchen |
| 229 | 49 | Water-Impacted | Second | G25N | Living Room |
| 232 | 49 | Water-Impacted | Second | G25N | Bathroom |
| 273 | 42 | Water-Impacted | Second | G25N | Bedroom |
| 276 | 48 | Water-Impacted | Second | G25N | Bathroom |
| 277 | 48 | Water-Impacted | Second | G25N | Kitchen |
| 293 | 33 | Flooded | Second | G25N | Bathroom |
| 299 | 11 | Flooded | Second | G25N | Outdoor |
| 321 | 4 | Flooded | Second | G25N | Kitchen |
| 323 | 54 | Water-Impacted | Second | G25N | Living Room |
| 372 | 33 | Flooded | Second | MEA | Bathroom |

**Supplementary Table S2:** Classification of *Aspergillus* isolates from sampled homes by subgenera, section, and series.

| Isolate Code | Species | Subgenera | Section | Series |
| --- | --- | --- | --- | --- |
| 19 | *A. versicolor* | *Nidulantes* | *Nidulantes* | *Versicolores* |
| 20 | *A. steynii* | *Circumdanti* | *Circumdanti* | *Steynorium* |
| 33 | *A. niger* | *Circumdanti* | *Nigri* | *Nigri* |
| 50 | *A. arenarioides* | *Circumdanti* | *Petersoniorum* | *Petersoniorum* |
| 75 | *A. chevalieri* | *Aspergillus* | *Aspergillus* | *Chevalierorum* |
| 77 | *A. petersonii* | *Circumdanti* | *Petersoniorum* | *Petersoniorum* |
| 111 | *A. subalbidus* | *Circumdanti* | *Candidi* | *Candidi* |
| 137 | *A. penicillioides* | *Aspergillus* | *Restricti* | *Penicillioides* |
| 139 | *A. sydowii* | *Nidulantes* | *Nidulantes* | *Versicolores* |
| 143 | *A. hordei* | *Aspergillus* | *Restricti* | *Penicillioides* |
| 150 | *A. versicolor* | *Nidulantes* | *Nidulantes* | *Versicolores* |
| 155 | *A. flavus* | *Circumdanti* | *Flavi* | *Flavi* |
| 159 | *A. ochraceopetaliformis* | *Circumdanti* | *Circumdanti* | *Steynorium* |
| 173 | *A. gracilis* | *Aspergillus* | *Restricti* | *Restricti* |
| 215 | *A. westerdijkiae* | *Circumdanti* | *Circumdanti* | *Circumdanti* |
| 226 | *A. chevalieri* | *Aspergillus* | *Aspergillus* | *Chevalierorum* |
| 229 | *A. tamarii* | *Circumdanti* | *Flavi* | *Kitamyces* |
| 232 | *A. hordei* | *Aspergillus* | *Restricti* | *Penicillioides* |
| 293 | *A. flocculosus* | *Circumdanti* | *Circumdanti* | *Steynorium* |
| 321 | *A. pseudoglaucus* | *Aspergillus* | *Aspergillus* | *Rubri* |
| 323 | *A. brunneoviolaceus* | *Circumdanti* | *Nigri* | *Japonici* |
| 372 | *A. oryzae* | *Circumdanti* | *Flavi* | *Flavi* |
| *A. fumigatus*  (control) | *A. fumigatus* | *Fumigati* | *Fumigati* | *Fumigati* |
| *A. brasiliensis*  (control) | *A. brasiliensis* | *Circumdanti* | *Nigri* | *Nigri* |

| Species | Culture Collection Number | GenBank Accession Number | | |
| --- | --- | --- | --- | --- |
| ***ITS*** | ***benA*** | ***CaM*** |
| *A. arenarioides* | CCF 4941  NRRL 4899 | LN849390  LN849386 | LN849404  LN849400 | LN849419  LN849415 |
| *A. brasiliensis* | IHEM 3766 | MH613079 | MH614415 | MH644891 |
| *A. brunneoviolaceus* | NRRL 4912 | EF661220 | EF661105 | EF661147 |
| *A. chevalieri* | CCF 1676  CGMCC 306492  NRRL 78 | LT670923  LT670928  NR_135340 | LT671011  LT671026  EF651911 | LT671012  LT671027  EF652002 |
| *A. flavus* | CBS 100927  NRRL 1957 | HM560055  AF027863 | EF329933  LC589341 | EF202063  LC589316 |
| *A. flocculosus* | CBS 112798  CBS 112799  NRRL 35668 | FJ491581  FJ491582  EF661432 | AY819954  AY819957  EF661352 | FJ491550  FJ491551  EF661371 |
| *A. fumigatus* | NRRL 163  ATCC 2014305 | EF669931  KC689329 | LC5893441  LC589343 | LC589319  LC589318 |
| *A. gracilis* | FCG 2279  NRRL 4962 | LC643138  NR_135334 | LC643222  EF651883 | LC643299  EF652031 |
| *A. hordei* | FCG 2362  NRRL 25826 | LC643145  KY087760 | LC643229  KY117823 | LC643306  KY068310 |
| *A. niger* | NRRL 3  NRRL 326 | EF661185  EF661186 | EF661088  EF589349 | EF661153  LC589323 |
| *A. ochraceopetaliformis* | NRRL 35055  NRRL 4752 | EF661431  NR_135390 | EF661351  EF661350 | EU014116  EF661388 |
| *A. oryzae* | NRRL 447 | NR_135395 | EF661483 | EF661506 |
| *A. penicillioides* | CCF 3282  NRRL 4548 | KY087657  NR_131285 | FR775347  EF651928 | HE578103  EF652024 |
| *A. petersonii* | CCF 4946  CCF 5101 | LN849396  LN873998 | LN849410  LN873997 | LN849425  LN849427 |
| *A. pseudoglaucus* | CCF 5386  CCF 5389  NRRL 40 | LT670972  LT670971  NR_135336 | LT671163  LT671160  EF651917 | LT671164  LT671161  EF652007 |
| *A. ruber* | CBS 104.18  NRRL 52 | LT670978  NR_131286 | LT671181  EF651920 | LT671182  EF652009 |
| *A. steynii* | CBS 112814  NRRL 35100 | FJ491564  LT594416 | AY819953  LT594396 | FJ491546  EF661369 |
| *A. subalbidus* | CCF 5696  CCF 5848 | ON156388  ON156387 | ON164571  ON164564 | ON164620  ON164613 |
| *A. sydowii* | FMR 14440  NRRL 254 | LN898735  AY660925 | LN898889  EF652275 | LN898812  LC589325 |
| *A. tamarii* | CBS 117626  NRRL 20818 | OL711678  NR_135325 | EF203122  EF661474 | EF202033  AY017587 |
| *A. versicolor* | NRRL 238  DTO:270-D1 | EF652442  KJ775589 | LC589363  KP329933 | EF652354  KJ775395 |
| *A. westerdijkiae* | CBS 112791  NRRL 3174  NRRL 5175 | FJ491570  NR_135389  EF661428 | AY819974  EF661329  EF661330 | FJ491536  EF661360  EF661393 |

**Supplementary Table S3:** Strains used for phylogenetic analyses of *Aspergillus* species isolated from water-damaged and flooded homes.
